# Supplementary material for: TRPM7 Modulates Human Pancreatic Stellate Cell Activation
Source: MDPI journal article supplement (doi:10.3390/cells11142255), 2022-07-21
Supplement: s1 [file s1]

**A**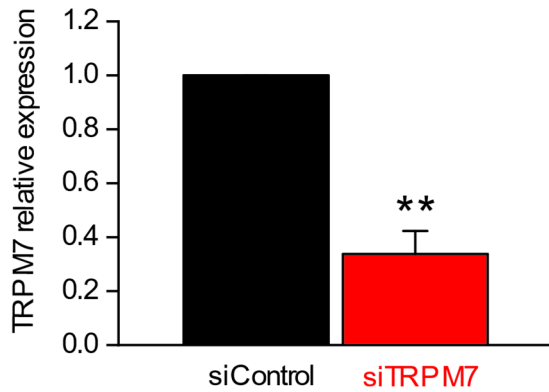**B**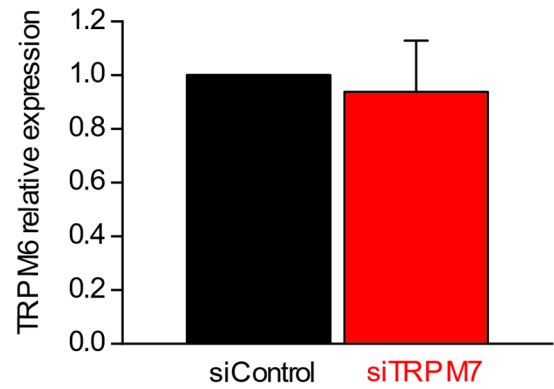

**Figure S1: Effect of TRPM7 targeting siRNA on TRPM6 and TRPM7 mRNA expressions.** (A) TRPM7 silencing decreased TRPM7 expression at the mRNA level (n=6). \*\* indicates  $p < 0.01$  (Mann-Whitney Rank Sum Test). (B) TRPM7 silencing had no effect on TRPM6 mRNA expression (n=4).

**A**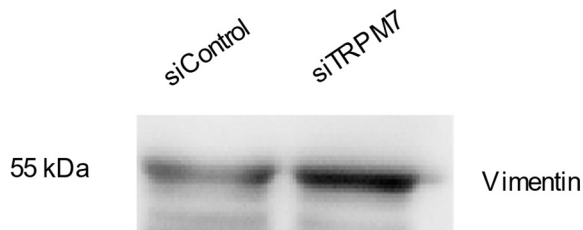**B**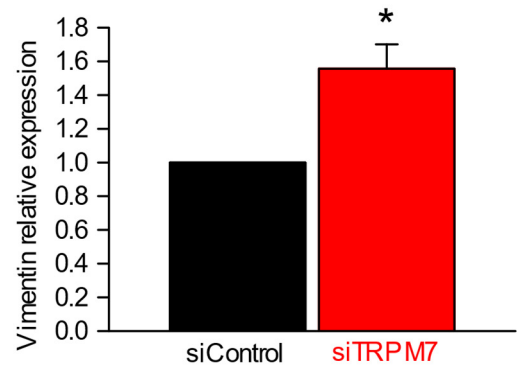

**Figure S2: Effect of TRPM7 targeting siRNA on vimentin expression.** (A) immunoblotting showing the effect of TRPM7 silencing on vimentin expression. (B) TRPM7 silencing increased vimentin expression (n=4). \* indicates  $p < 0.01$  (Mann-Whitney Rank Sum Test).

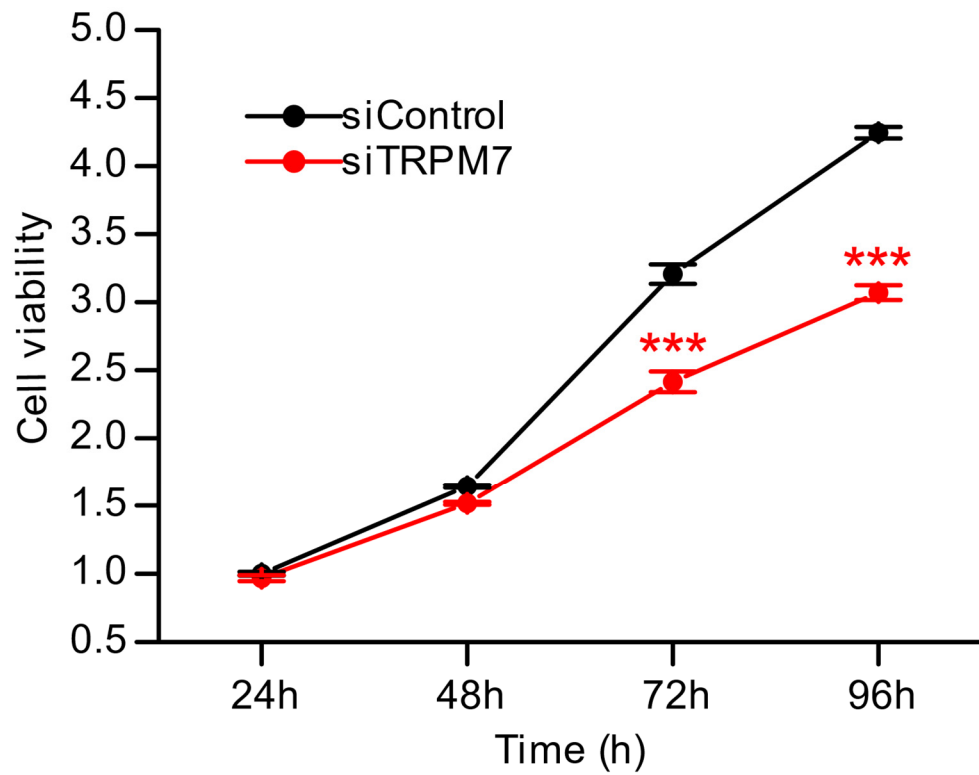

**Figure S3: Effect of TRPM7 targeting siRNA on RLT-PSC viability.** \*\*\* indicates  $p < 0.001$  (2-ways ANOVA).
